# Supplementary material for: Photodynamic Therapy Combined with Bcl-2/Bcl-xL Inhibition Increases the Noxa/Mcl-1 Ratio Independent of Usp9X and Synergistically Enhances Apoptosis in Glioblastoma
Source: MDPI journal article supplement (doi:10.3390/cancers13164123), 2021-08-17
Supplement: s1 [file s1]

a

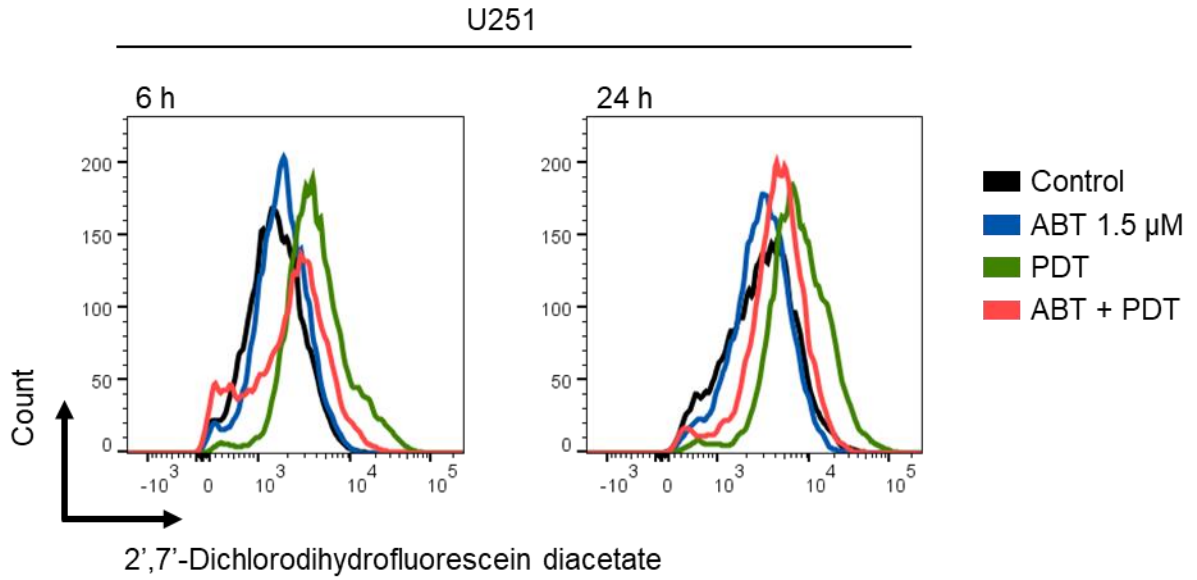

b

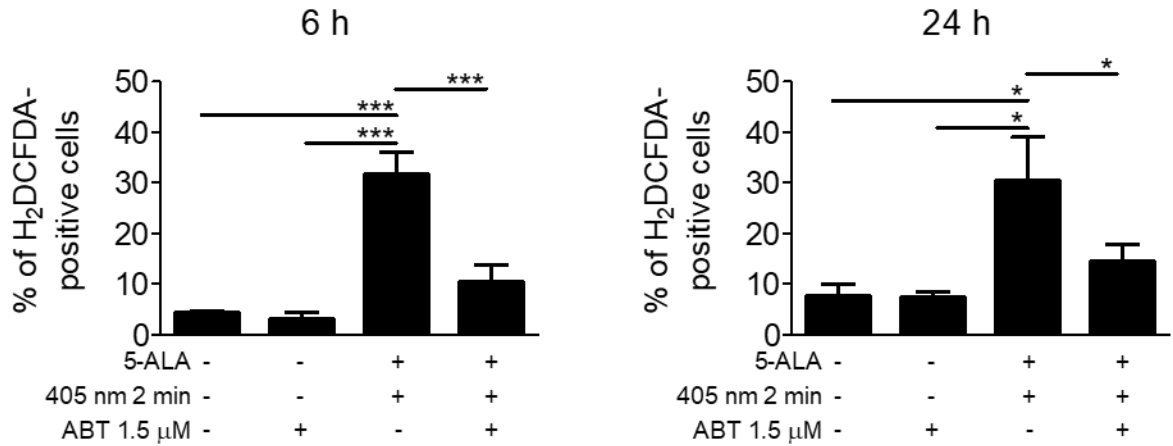

**Figure S1.** (a), U251 cells were subjected to solvent, 1.5 μM ABT-263 (ABT), 25 μg/ml 5-ALA combined with exposure to light with a wavelength of 405 nm for 2 min (PDT) or PDT plus ABT. After 6 h or 24 h, staining with 2',7'-Dichlorodihydrofluorescein diacetate (H<sub>2</sub>DCFDA) and flow cytometry was performed. Representative histograms are shown representative for 3 independent experiments. (b), Quantitative representation of U251 cells subjected to the same treatment as outlined in b. Columns, mean; bars, SD; n=3. \*p<0.05, \*\*\*p<0.005.
