# Supplementary figures and images for: Photodynamic Therapy Combined with Bcl-2/Bcl-xL Inhibition Increases the Noxa/Mcl-1 Ratio Independent of Usp9X and Synergistically Enhances Apoptosis in Glioblastoma
Source: MDPI journal article supplement (doi:10.3390/cancers13164123), 2021-08-17

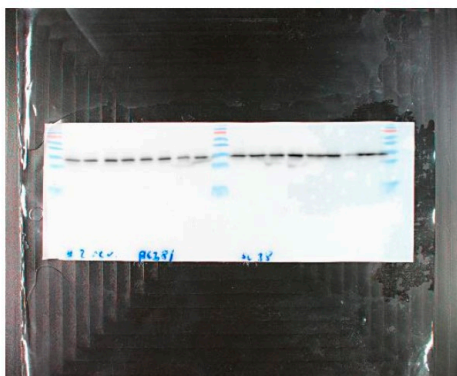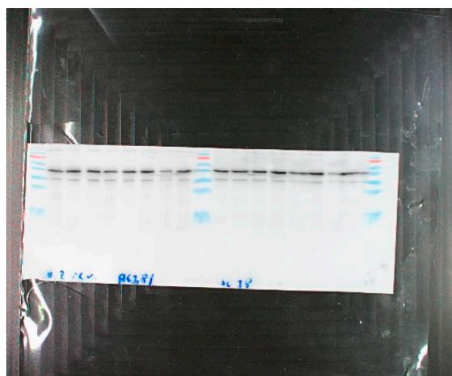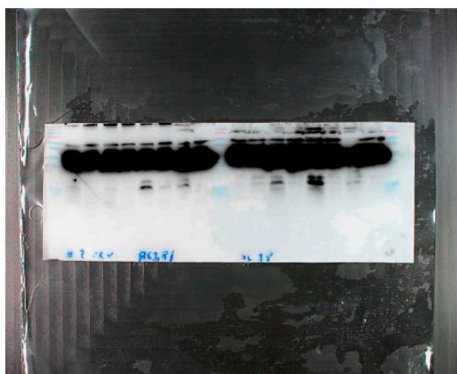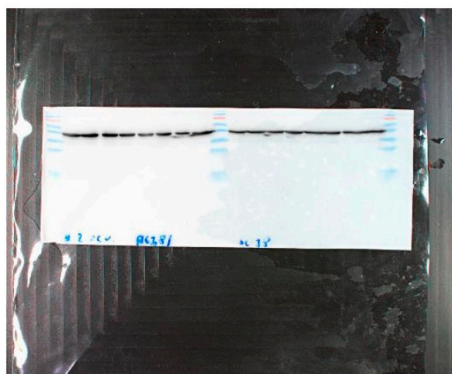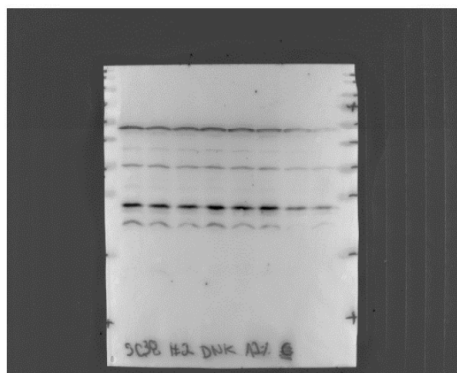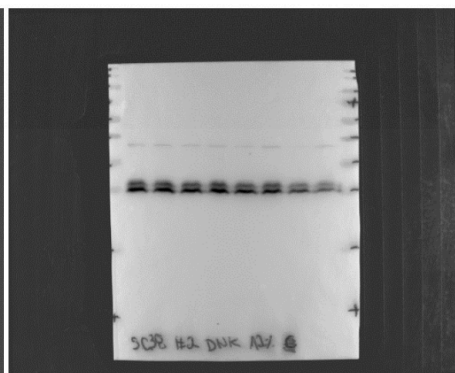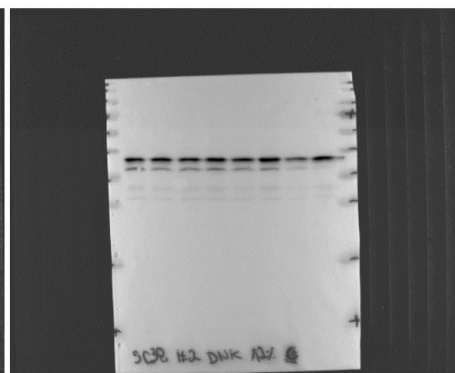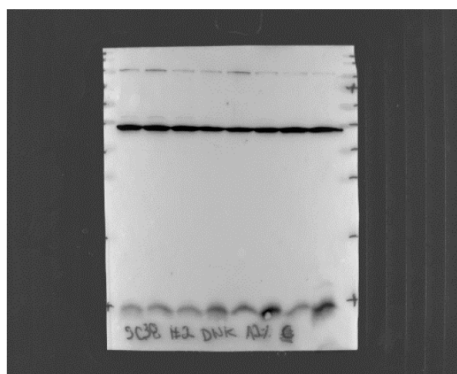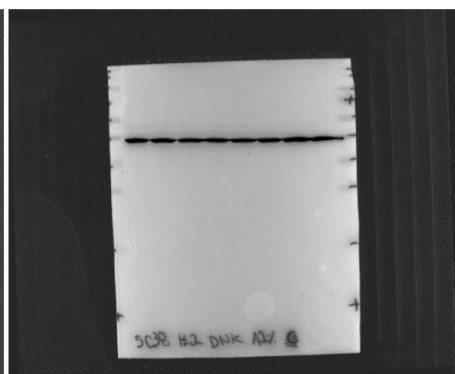

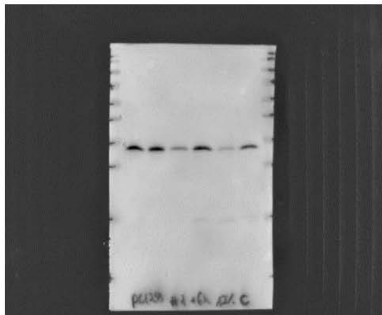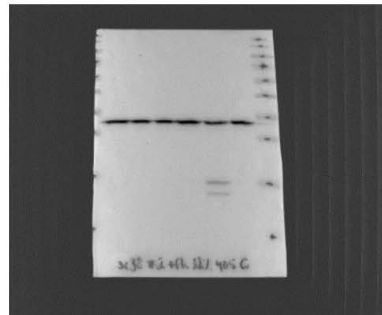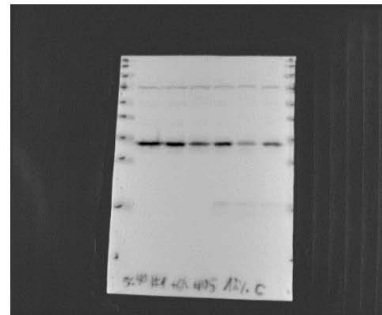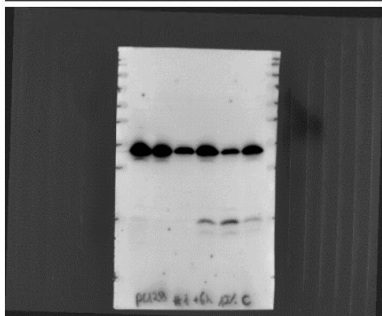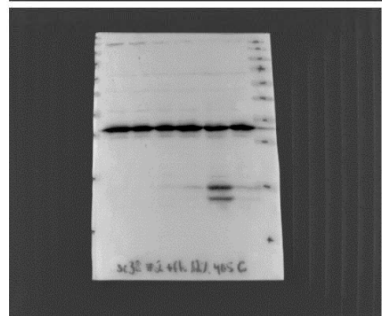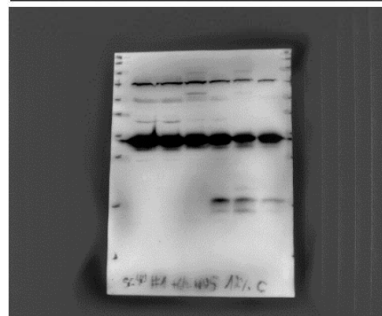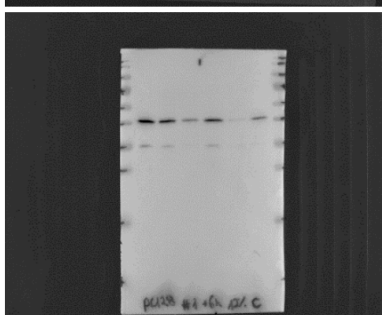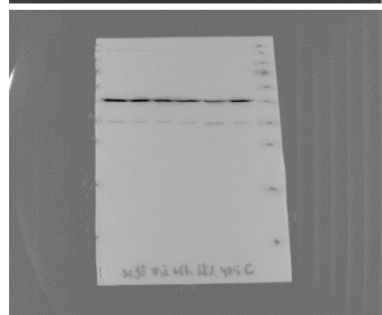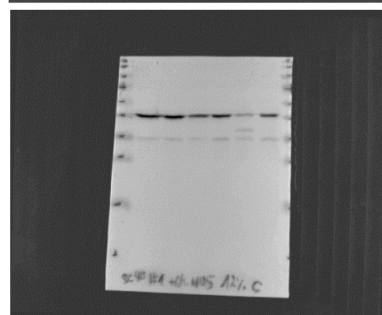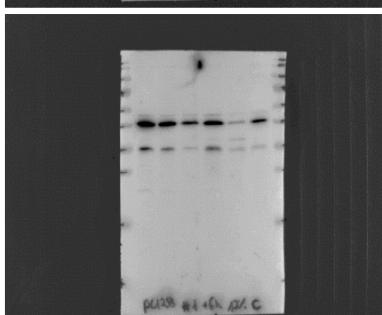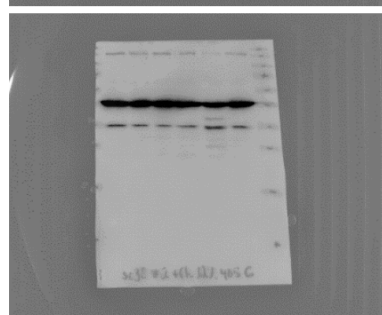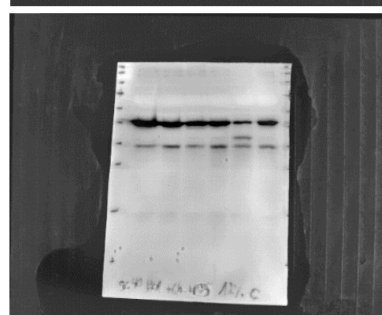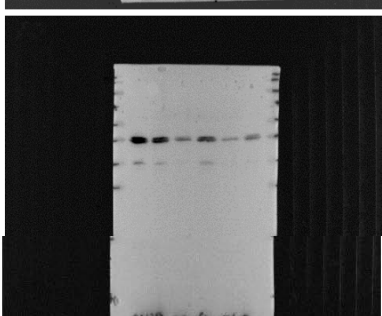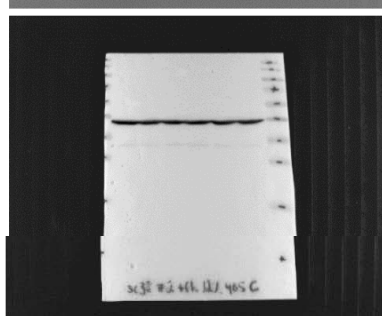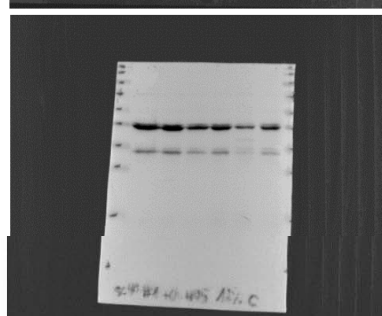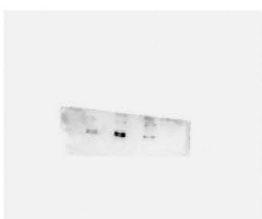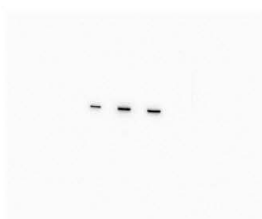



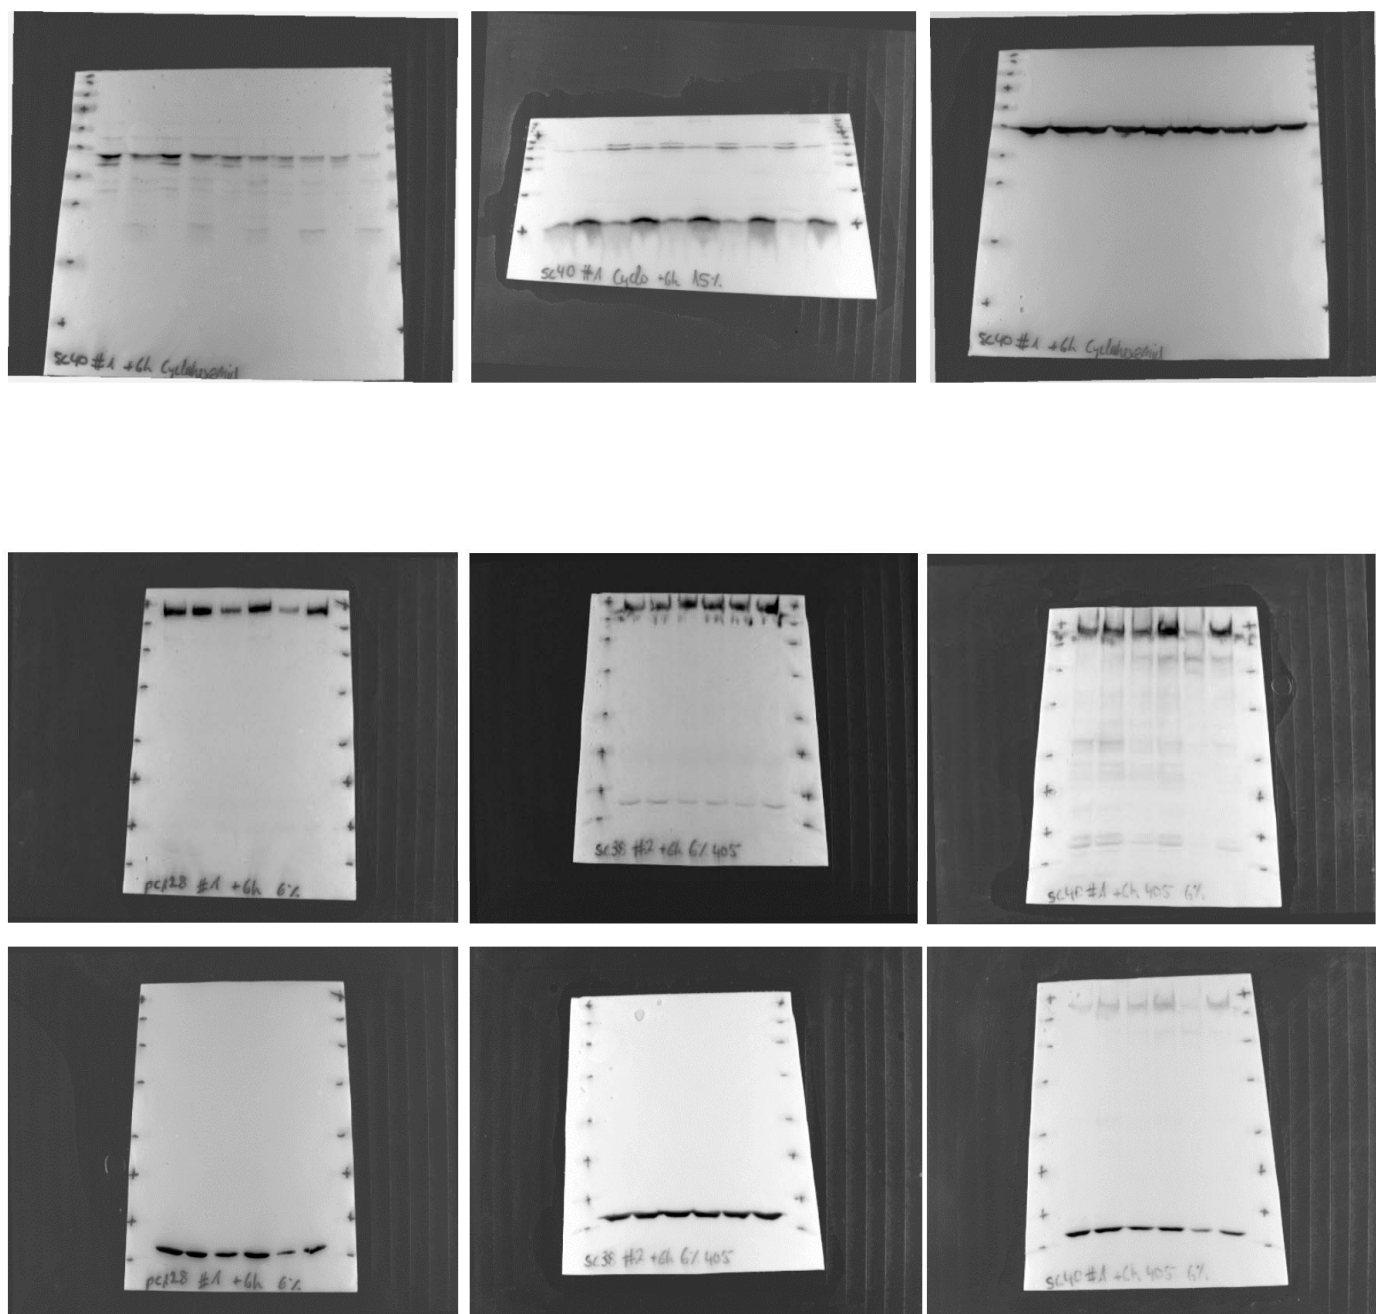

Figure S2. Uncropped Western Blots.

Supplement: s1 [file s1]
